# Supplementary material
Source: publisher figshare collection journal article supplement (https://tandf.figshare.com/ndownloader/files/35106165)
Supplement: Supplementary file 2 [file 35106165]

This form documents the artifacts associated with the article (i.e., the data and code supporting the computational findings) and describes how to reproduce the findings.

## Part 1: Data

- ☐ This paper does not involve analysis of external data (i.e., no data are used or the only data are generated by the authors via simulation in their code).
- ☒ I certify that the author(s) of the manuscript have legitimate access to and permission to use the data used in this manuscript.

### Abstract

The dataset for the MLP is CleanedDataset.sav and the data dictionary is Codebook.xlsx. Both were downloaded from the MLP OSF website.

### Availability

- ☒ Data **are** publicly available.
- ☐ Data **cannot be made** publicly available.

If the data are publicly available, see the *Publicly available data* section. Otherwise, see the *Non-publicly available data* section, below.

#### Publicly available data

- ☐ Data are available online at:
- ☒ Data are available as part of the paper's supplementary material.
- ☐ Data are publicly available by request, following the process described here:
- ☐ Data are or will be made available through some other mechanism, described here:

#### Non-publicly available data

### Description

#### File format(s)

- ☐ CSV or other plain text.
- ☒ Software-specific binary format (.Rda, Python pickle, etc.): .sav
- ☐ Standardized binary format (e.g., netCDF, HDF5, etc.):
- ☐ Other (please specify):

#### Data dictionary

- ☒ Provided by authors in the following file(s): Codebook.xlsx
- ☐ Data file(s) is(are) self-describing (e.g., netCDF files)
- ☐ Available at the following URL:

## Additional Information (optional)

## Part 2: Code

### Abstract

The R script `process.data.R` processes the raw data. The R scripts `run.model1.R` and `run.model2.R` fit the models and create the plots corresponding to the principal results and political ideology results respectively for the MLP. They rely on the stan scripts `modell.stan` and `model2.stan` respectively.

### Description

#### Code format(s)

- ☐ Script files
  - ☒ R
  - ☐ Python
  - ☐ Matlab
  - ☒ Other: Stan
- ☐ Package
  - ☐ R
  - ☐ Python
  - ☐ MATLAB toolbox
  - ☐ Other:
- ☐ Reproducible report
  - ☐ R Markdown
  - ☐ Jupyter notebook
  - ☐ Other:
- ☐ Shell script
- ☐ Other (please specify):

#### Supporting software requirements

#### Version of primary software used

R version 4.0.2

#### Libraries and dependencies used by the code

ggplot2 version 3.3.2  
reshape2 version 1.4.4  
abind version 1.4-5  
rstan version 2.21.2

#### Supporting system/hardware requirements (optional)

MacOS 10.15.7

## Parallelization used

- ☐ No parallel code used
- ☒ Multi-core parallelization on a single machine/node
  - Number of cores used: 4
- ☐ Multi-machine/multi-node parallelization
  - Number of nodes and cores used:

## License

- ☒ MIT License (default)
- ☐ BSD
- ☐ GPL v3.0
- ☐ Creative Commons
- ☐ Other: (please specify below)

## Additional information (optional)

Simply run `run.model1.R` and `run.model2.R` either as a shell script or by cutting and pasting into the R console or RStudio console.

## Scope

The provided workflow reproduces:

- ☐ Any numbers provided in text in the paper
- ☐ All tables and figures in the paper
- ☒ Selected tables and figures in the paper, as explained and justified below:

The file reproduces all results figures for the MLP (i.e., Figures 6-10); there are no results tables.

## Workflow

### Format(s)

- ☒ Single master code file
- ☐ Wrapper (shell) script(s)
- ☐ Self-contained R Markdown file, Jupyter notebook, or other literate programming approach
- ☐ Text file (e.g., a readme-style file) that documents workflow
- ☐ Makefile
- ☐ Other (more detail in *Instructions* below)

## Instructions

The R script `process.data.R` processes the raw data. The R scripts `run.model1.R` and `run.model2.R` fit the models and create the plots corresponding to the principal results and political ideology results respectively for the MLP. They rely on the stan scripts `model1.stan` and `model2.stan` respectively.

**Expected run-time**

Approximate time needed to reproduce the analyses on a standard desktop machine:

- ☐ < 1 minute
- ☐ 1-10 minutes
- ☐ 10-60 minutes
- ☐ 1-8 hours
- ☒ > 8 hours
- ☐ Not feasible to run on a desktop machine, as described here:

**Additional information (optional)**

**Notes (optional)**
